# Supplementary material for: Estimated GFR, Albuminuria, and Physical Function: The Brain in Kidney Disease (BRINK) Cohort Study
Source: PubMed Central journal article supplement — Kidney Med. 2022 Aug 10;4(10):100531. doi: 10.1016/j.xkme.2022.100531 (PMC9523089; doi:10.1016/j.xkme.2022.100531), 2022-08-10
Supplement: mmc1.pdf [file mmc1.pdf]

**Table S1. Descriptive statistics of outcome, predictors and covariates: Overall (N = 568 with UACR data) and by UACR group**

| <b>Outcome<br/>Covariates and Predictors</b>                            | <b>Overall<br/>N = 568</b> | <b>UACR<br/>&gt; 300<br/>N = 119</b> | <b>UACR<br/>30 - 300<br/>N = 153</b> | <b>UACR<br/>&lt; 30<br/>N = 296</b> |
|-------------------------------------------------------------------------|----------------------------|--------------------------------------|--------------------------------------|-------------------------------------|
| <b>SPPB group: binary N (%)</b>                                         |                            |                                      |                                      |                                     |
| 0-9                                                                     | 220 (38.7)                 | 56 (47.1)                            | 78 (51.0)                            | 86 (29.1)                           |
| 10 – 12                                                                 | 348 (61.3)                 | 63 (52.9)                            | 75 (49.0)                            | 210 (70.9)                          |
| <b>SPPB group: 4-level N (%)</b>                                        |                            |                                      |                                      |                                     |
| 0 – 6                                                                   | 86 (15.1)                  | 23 (19.3)                            | 32 (20.9)                            | 31 (10.5)                           |
| 7 – 9                                                                   | 134 (23.6)                 | 33 (27.7)                            | 46 (30.1)                            | 55 (18.6)                           |
| 10 – 11                                                                 | 188 (33.1)                 | 40 (33.6)                            | 45 (29.4)                            | 103 (34.8)                          |
| 12                                                                      | 160 (28.2)                 | 23 (19.3)                            | 30 (19.6)                            | 107 (36.2)                          |
| <b>SPPB total score: Mean (SD)</b>                                      | 9.4 (2.7)                  | 8.9 (2.9)                            | 8.8 (2.7)                            | 10.0 (2.5)                          |
| <b>Gait speed: m/sec, Mean (SD)</b>                                     | 0.96 (0.27)                | 0.93 (0.29)                          | 0.90 (0.28)                          | 0.99 (0.25)                         |
| <b>eGFR<sub>Cr</sub> group: ml/min/1.73m<sup>2</sup>, 4-level N (%)</b> |                            |                                      |                                      |                                     |
| <30                                                                     | 156 (27.5)                 | 71 (59.7)                            | 52 (34.0)                            | 33 (11.2)                           |
| 30 - <45                                                                | 193 (34.0)                 | 39 (32.8)                            | 63 (41.2)                            | 91 (30.7)                           |
| 45 - <60                                                                | 82 (14.4)                  | 6 (5.0)                              | 20 (13.1)                            | 56 (18.9)                           |
| ≥60                                                                     | 137 (24.1)                 | 3 (2.5)                              | 18 (11.8)                            | 116 (39.2)                          |
| <b>eGFR<sub>Cr</sub>: ml/min/1.73m<sup>2</sup>, Mean (SD)</b>           | 45.0 (23.2)                | 28.5 (14.4)                          | 38.8 (19.5)                          | 54.9 (23.0)                         |
| <b>eGFR<sub>CysC</sub>: ml/min/1.73m<sup>2</sup>, 4-level N (%)</b>     |                            |                                      |                                      |                                     |
| < 30                                                                    | 302 (55.3)                 | 90 (79.0)                            | 86 (58.9)                            | 126 (44.1)                          |
| 30 - <45                                                                | 84 (15.4)                  | 19 (16.7)                            | 26 (17.8)                            | 39 (13.6)                           |
| 45 - <60                                                                | 56 (10.3)                  | 3 (2.6)                              | 13 (8.9)                             | 40 (14.0)                           |
| ≥60                                                                     | 104 (19.1)                 | 2 (1.8)                              | 21 (14.4)                            | 81 (28.3)                           |
| <b>eGFR<sub>CysC</sub>: ml/min/1.73m<sup>2</sup>, Mean (SD)</b>         | 36.1 (31.9)                | 21.6 (14.3)                          | 31.1 (26.8)                          | 44.5 (36.6)                         |
| <b>UACR group: mg/g, 3-level N (%)</b>                                  |                            |                                      |                                      |                                     |
| <30                                                                     | 296 (52.1)                 |                                      |                                      | 296 (100)                           |
| 30 - 300                                                                | 153 (26.9)                 |                                      | 153 (100)                            |                                     |
| >300                                                                    | 119 (21.0)                 | 119 (100)                            |                                      |                                     |
| <b>UACR: mg/g, Median [IQR]</b>                                         | 26.3 [0.0, 193]            | 1081 [563, 2189]                     | 81 [48, 140]                         | 0.0 [0.0, 0.0]                      |
| <b>Hgb: g/dL, N (%)</b>                                                 |                            |                                      |                                      |                                     |
| ≤12                                                                     | 171 (30.2)                 | 62 (52.1)                            | 51 (33.6)                            | 58 (19.6)                           |
| >12                                                                     | 396 (69.8)                 | 57 (47.9)                            | 101 (66.4)                           | 238 (80.4)                          |
| <b>Hgb: g/dL, Mean (SD)</b>                                             | 12.95 (1.71)               | 12.1 (1.8)                           | 12.8 (1.8)                           | 13.4 (1.4)                          |
| <b>Bicarbonate (CO<sub>2</sub>): mEq/L, N (%)</b>                       |                            |                                      |                                      |                                     |
| <20                                                                     | 24 (4.2)                   | 10 (8.4)                             | 10 (6.5)                             | 4 (1.4)                             |
| ≥20                                                                     | 544 (95.8)                 | 109 (91.6)                           | 143 (93.5)                           | 292 (98.6)                          |
| <b>Bicarbonate (CO<sub>2</sub>): mEq/L Mean (SD)</b>                    | 25.8 (3.4)                 | 24.5 (3.5)                           | 25.0 (3.6)                           | 26.7 (3.0)                          |
| <b>SBP group: mmHg, 3-level N (%)</b>                                   |                            |                                      |                                      |                                     |
| <120                                                                    | 152 (26.9)                 | 17 (14.4)                            | 35 (22.9)                            | 100 (33.9)                          |
| 120 - <140                                                              | 217 (38.3)                 | 39 (33.1)                            | 59 (38.6)                            | 119 (40.3)                          |
| ≥140                                                                    | 197 (34.8)                 | 62 (52.5)                            | 59 (38.6)                            | 76 (25.8)                           |
| <b>SBP: mmHg, Mean (SD)</b>                                             | 132.5 (18.6)               | 141.3 (20.2)                         | 133.9 (17.2)                         | 128.1 (17.2)                        |
| <b>Pulse Pressure: mmHg</b>                                             | 63.6 (16.7)                | 70.3 (19.3)                          | 65.1 (15.6)                          | 60.1 (15.1)                         |
| <b>Serum Albumin group: mg/dL, N (%)</b>                                |                            |                                      |                                      |                                     |

|                                                   |            |            |            |            |
|---------------------------------------------------|------------|------------|------------|------------|
| <4                                                | 121 (21.3) | 56 (47.1)  | 34 (22.2)  | 31 (10.5)  |
| ≥4                                                | 447 (78.7) | 63 (52.9)  | 119 (77.8) | 265 (89.5) |
| <b>Serum Albumin: mg/dL Mean (SD)</b>             | 4.2 (0.39) | 3.9 (0.43) | 4.3 (0.37) | 4.3 (0.33) |
| <b>BMI group: kg/m<sup>2</sup>, 3-level N (%)</b> |            |            |            |            |
| Not Overweight: BMI <25                           | 107 (18.9) | 15 (12.7)  | 27 (17.7)  | 65 (22.1)  |
| Overweight: BMI 25 - <30                          | 159 (28.1) | 31 (26.3)  | 49 (32.0)  | 79 (26.9)  |
| Obese: BMI ≥30                                    | 299 (52.9) | 72 (61.0)  | 77 (50.3)  | 150 (51.0) |
| <b>BMI: kg/m<sup>2</sup>, Mean (SD)</b>           | 31.3 (7.2) | 32.5 (7.0) | 31.3 (7.4) | 30.9 (7.2) |
| <b>Tobacco use group: N (%)</b>                   |            |            |            |            |
| Never                                             | 247 (43.5) | 39 (32.8)  | 58 (37.9)  | 150 (50.7) |
| Previous                                          | 263 (46.3) | 58 (48.7)  | 79 (51.6)  | 126 (42.6) |
| Current                                           | 58 (10.2)  | 22 (18.5)  | 16 (10.5)  | 20 (6.8)   |
| <b>Diabetes group, N (%)</b>                      |            |            |            |            |
| No DM                                             | 296 (52.1) | 38 (31.9)  | 67 (43.8)  | 191 (64.5) |
| Controlled DM, A1c <7.5%                          | 161 (28.4) | 51 (42.9)  | 41 (26.8)  | 69 (23.3)  |
| Uncontrolled DM, A1c ≥7.5%                        | 111 (19.5) | 30 (25.2)  | 45 (29.4)  | 36 (12.2)  |
| <b>CVD, history of</b>                            |            |            |            |            |
| No                                                | 329 (57.9) | 58 (48.7)  | 72 (47.1)  | 199 (67.2) |
| Yes                                               | 239 (42.1) | 61 (51.3)  | 81 (52.9)  | 97 (32.8)  |
| <b>CHF, history of</b>                            |            |            |            |            |
| No                                                | 488 (85.9) | 96 (80.7)  | 119 (77.8) | 273 (92.2) |
| Yes                                               | 80 (14.1)  | 23 (19.3)  | 34 (22.2)  | 23 (7.8)   |
| <b>Stroke/TIA, history of</b>                     |            |            |            |            |
| No                                                | 476 (83.8) | 98 (82.4)  | 121 (79.1) | 257 (86.8) |
| Yes                                               | 92 (16.2)  | 21 (17.6)  | 32 (20.9)  | 39 (13.2)  |
| <b>Age: Mean (SD)</b>                             | 69.3 (9.8) | 66.2 (9.7) | 70.4 (9.9) | 69.9 (9.6) |
| <b>Years of Education: Mean (SD)</b>              | 14.3 (2.8) | 13.7 (2.8) | 14.0 (2.8) | 14.7 (2.7) |
| <b>Black Race: N (%)</b>                          | 89 (15.7)  | 27 (22.7)  | 31 (20.3)  | 31 (10.5)  |
| <b>Gender: N (%)</b>                              |            |            |            |            |
| Male                                              | 282 (49.7) | 78 (65.6)  | 90 (58.8)  | 114 (38.5) |
| Female                                            | 286 (50.4) | 41 (34.4)  | 63 (41.2)  | 182 (61.5) |

**Table S2. Comparison of the Univariate and Multivariable Association Between Different Measures of Kidney Function and Low Physical Function modeled as a 4-level ordinal outcome**

| Measure of kidney function                                                     | Unadjusted Proportional OR (95% CI) | Adjusted <sup>a</sup> Proportional OR (95% CI) in models without UACR | Adjusted <sup>a</sup> Proportional OR (95% CI) in models with UACR |
|--------------------------------------------------------------------------------|-------------------------------------|-----------------------------------------------------------------------|--------------------------------------------------------------------|
| <b>eGFR<sub>Cr</sub> ml/min/1.73m<sup>2</sup></b><br><b>reference = ≥ 60</b>   |                                     |                                                                       |                                                                    |
| <30                                                                            | 3.32 (2.17, 5.07)                   | 1.06 (0.63, 1.78)                                                     | 0.86 (0.49, 1.49)                                                  |
| 30 - <45                                                                       | 1.90 (1.27, 2.84)                   | 0.86 (0.55, 1.36)                                                     | 0.75 (0.47, 1.20)                                                  |
| 45 - <60                                                                       | 1.96 (1.19, 3.23)                   | 1.10 (0.64, 1.89)                                                     | 1.04 (0.61, 1.79)                                                  |
| <b>UACR mg/g</b><br><b>reference = &lt; 30</b>                                 |                                     |                                                                       |                                                                    |
| >300                                                                           | 2.21 (1.50, 3.25)                   |                                                                       | 1.60 (0.95, 2.67) <sup>b</sup>                                     |
| 30 - 300                                                                       | 2.43 (1.70, 3.47)                   |                                                                       | 1.64 (1.08, 2.48) <sup>b</sup>                                     |
| <b>eGFR<sub>CysC</sub> ml/min/1.73m<sup>2</sup></b><br><b>reference = ≥ 60</b> |                                     |                                                                       |                                                                    |
| <30                                                                            | 2.61 (1.72, 3.94)                   | 1.45 (0.91, 2.30)                                                     | 1.36 (0.85, 2.18)                                                  |
| 30 - <45                                                                       | 1.74 (1.03, 2.94)                   | 1.05 (0.59, 1.87)                                                     | 0.98 (0.55, 1.76)                                                  |
| 45 - <60                                                                       | 2.27 (1.25, 4.10)                   | 1.62 (0.85, 3.07)                                                     | 1.63 (0.86, 3.08)                                                  |
| <b>UACR mg/g</b><br><b>reference = &lt; 30</b>                                 |                                     |                                                                       |                                                                    |
| >300                                                                           |                                     |                                                                       | 1.32 (0.80, 2.18) <sup>c</sup>                                     |
| 30 - 300                                                                       |                                     |                                                                       | 1.49 (0.99, 2.26) <sup>c</sup>                                     |

<sup>a</sup>Model adjusted for hemoglobin, serum bicarbonate, serum albumin, body mass index, diabetes (none, controlled, not controlled), pulse pressure, cardiovascular disease, congestive heart failure, stroke or transient ischemic attack, smoking status (current, former, never), race (black vs other), sex, age, age<sup>2</sup>, years of education.

<sup>b</sup>Adjusted Proportional OR (95% CI) for UACR in model with eGFR<sub>Cr</sub> and covariates listed above.

<sup>c</sup>Adjusted Proportional OR (95% CI) for UACR in model with eGFR<sub>CysC</sub> and covariates listed above.

**Table S3. LS Means for SPPB score by kidney function category**

| Measure of Kidney Function                                                                                                                                                                                 | N   | LS Mean (SE) |
|------------------------------------------------------------------------------------------------------------------------------------------------------------------------------------------------------------|-----|--------------|
| <b>eGFR-Cr category</b>                                                                                                                                                                                    |     |              |
| < 30                                                                                                                                                                                                       | 155 | 7.87 (0.31)  |
| 30 - <45                                                                                                                                                                                                   | 192 | 8.17 (0.34)  |
| 45 - <60                                                                                                                                                                                                   | 81  | 7.67 (0.40)  |
| ≥ 60 (Normal)                                                                                                                                                                                              | 135 | 7.65 (0.39)  |
| <b>eGFR-CysC category</b>                                                                                                                                                                                  |     |              |
| < 30                                                                                                                                                                                                       | 300 | 7.87 (0.31)  |
| 30 - <45                                                                                                                                                                                                   | 83  | 8.21 (0.39)  |
| 45 - <60                                                                                                                                                                                                   | 56  | 7.55 (0.42)  |
| ≥ 60 (Normal)                                                                                                                                                                                              | 102 | 8.20 (0.39)  |
| <b>UACR category</b>                                                                                                                                                                                       |     |              |
| < 30 (Normal)                                                                                                                                                                                              | 293 | 8.23 (0.35)  |
| 30 - 300                                                                                                                                                                                                   | 152 | 7.62 (0.34)  |
| >300                                                                                                                                                                                                       | 118 | 7.67 (0.37)  |
| LS Mean is adjusted for hemoglobin, bicarbonate, lserum albumin, BMI category, diabetes, pulse pressure, CVD, CHF, Stroke/ TIA, Smoking, Black race, gender, years of education, age, and age <sup>2</sup> |     |              |

**Table S4. Association Between Covariates and Gait Speed in Models Using eGFR<sub>Cr</sub> and eGFR<sub>cysC</sub>**

| Predictor or Covariate                               | Adjusted Slope (SE)<br>for model using<br>eGFR <sub>Cr</sub> | p-value | Adjusted Slope (SE)<br>for model using<br>eGFR <sub>cysC</sub> | p-value |
|------------------------------------------------------|--------------------------------------------------------------|---------|----------------------------------------------------------------|---------|
| eGFR <30 vs ≥ 60                                     | 0.025 (0.033)                                                | 0.46    | -0.062 (0.028)                                                 | 0.03    |
| eGFR 30 - <45 vs ≥ 60                                | 0.007 (0.028)                                                | 0.81    | -0.027 (0.035)                                                 | 0.44    |
| eGFR 45 - <60 vs ≥ 60                                | -0.006 (0.032)                                               | 0.85    | -0.027 (0.038)                                                 | 0.47    |
| UACR: mg/g, 30- 300 vs <30                           | -0.039 (0.025)                                               | 0.12    | -0.024 (0.025)                                                 | 0.33    |
| UACR: mg/g, > 300 vs <30                             | -0.036 (0.031)                                               | 0.25    | -0.006 (0.031)                                                 | 0.84    |
| Hgb: g/dL, ≤ 12 vs >12                               | -0.050 (0.024)                                               | 0.04    | -0.039 (0.024)                                                 | 0.10    |
| Bicarbonate (CO <sub>2</sub> ): mEq/L, < 20 vs ≥ 20  | -0.122 (0.050)                                               | 0.02    | -0.112 (0.050)                                                 | 0.03    |
| Serum Albumin: mg/dL, < 4 vs ≥4                      | 0.005 (0.026)                                                | 0.85    | 0.010 (0.027)                                                  | 0.71    |
| BMI: kg/m <sup>2</sup> , OW: 25 - <30 vs Not OW: <25 | -0.102 (0.029)                                               | < 0.001 | -0.105 (0.029)                                                 | < 0.001 |
| BMI: kg/m <sup>2</sup> , Obese: ≥ 30 vs Not OW: <25  | -0.138 (0.028)                                               | < 0.001 | -0.143 (0.028)                                                 | < 0.001 |
| DM (A1c < 7.5%) controlled vs No DM                  | -0.052 (0.025)                                               | 0.04    | -0.045 (0.026)                                                 | 0.08    |
| DM not controlled (A1c ≥ 7.5%) vs No DM              | -0.071 (0.028)                                               | 0.01    | -0.064 (0.029)                                                 | 0.03    |
| Pulse Pressure: 1 mmHg increase                      | -0.0003 (0.0007)                                             | 0.64    | -0.0004 (0.0007)                                               | 0.61    |
| CVD: Yes vs No                                       | -0.039 (0.022)                                               | 0.07    | -0.040 (0.022)                                                 | 0.07    |
| CHF: Yes vs No                                       | -0.119 (0.029)                                               | < 0.001 | -0.123 (0.030)                                                 | < 0.001 |
| Stroke/TIA: Yes vs No                                | -0.022 (0.028)                                               | 0.42    | -0.029 (0.028)                                                 | 0.31    |
| Current smoker vs Never smoked                       | -0.0002 (0.036)                                              | 0.10    | -0.009 (0.038)                                                 | 0.82    |
| Previous smoker vs Never smoked                      | 0.019 (0.021)                                                | 0.36    | 0.020 (0.022)                                                  | 0.37    |
| Black race: Yes vs No                                | -0.103 (0.030)                                               | < 0.001 | -0.091 (0.035)                                                 | 0.009   |
| Gender: Female vs Male                               | -0.118 (0.020)                                               | < 0.001 | -0.123 (0.021)                                                 | < 0.001 |
| Age, each additional year                            | -0.004 (0.011)                                               | 0.74    | -0.0008 (0.011)                                                | 0.94    |
| Age <sup>2</sup>                                     | -0.00003 (0.00008)                                           | 0.67    | -0.00005 (0.00008)                                             | 0.52    |
| Years of education, each additional year             | 0.009 (0.004)                                                | 0.02    | 0.008 (0.004)                                                  | 0.04    |
